# Supplementary material for: Adenosine Methylation Level of miR-125a-5p Promotes Anti-PD-1 Therapy Escape through the Regulation of IGSF11/VSIG3 Expression
Source: MDPI journal article supplement (doi:10.3390/cancers15123188), 2023-06-14
Supplement: s1 [file s1]

# A

|             | 1 | 2 | 3 | 4 | 5 | 6 | 7 | 8 | 9 | 10 | 11 | 12 | 13 | 14 | 15 | 16 | 17 | 18 | 19 | 20 | 21 | 22 | 23 | 24 |
|-------------|---|---|---|---|---|---|---|---|---|----|----|----|----|----|----|----|----|----|----|----|----|----|----|----|
| miR-125a-5p | u | c | c | c | u | g | a | g | a | c  | c  | c  | u  | u  | u  | a  | a  | c  | c  | u  | g  | u  | g  | a  |
|             |   |   |   |   |   |   | D | R | A | C  | H  |    |    |    | D  | R  | A  | C  | H  |    |    |    |    |    |
| miR-181c-5p | a | a | c | a | u | u | c | a | a | c  | c  | u  | g  | u  | c  | g  | g  | u  | g  | a  | g  | u  |    |    |
|             |   |   |   |   |   |   |   |   |   |    |    |    |    |    | c  | g  |    |    |    |    |    |    |    |    |
|             |   |   |   |   |   |   |   |   |   |    |    |    |    |    | c  | g  |    |    |    |    |    |    |    |    |

# B

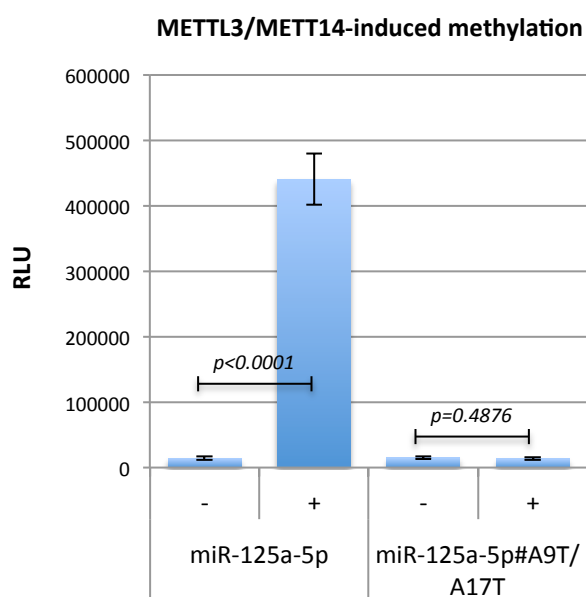

# C

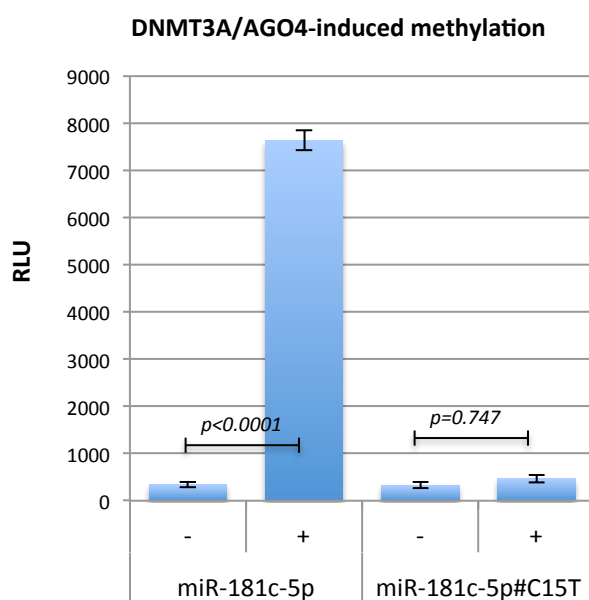

## Supplementary Figure S1.

### Identification of methylated nucleotides in miRNAs.

**A.** position of nucleotides identified as methylatable adenosine and cytosine in miR-125a-5p and miR-181c-3p.

**B and C.** This experiment was performed using the MTase-Glo Methyltransferase Assay Kit (Promega). ThemRNA (2  $\mu$ M) was incubated with i) 0.2  $\mu$ M of DNMT3A/AGO4 complex (Active Motif, France) in a reaction buffer containing 20 mM Tris-HCl (pH 8.0), 50 mM NaCl, 1 mM EDTA, 1 mM DTT, 5% glycerol, 0.1 mg/ml bovine serum albumin (BSA) and 10  $\mu$ M SAM at 37°C for 1 h; or ii) 0.5  $\mu$ M of METTL3 / METTL14 complex (Active motif, France) in a reaction buffer containing 50 mM Tris-HCl pH 8.6, 0.02% Triton X-100, 2 mM MgCl<sub>2</sub>, 1 mM TCEP and 10  $\mu$ M SAM at 21-23° for 1h. The reaction was stopped by addition of 1  $\mu$ l 0.5% trifluoroacetic acid (TFA). After 5 min of incubation with TFA, 5 $\times$ MTase-Glo Reagent was added, mixed well and incubated at room temperature for 30 min. Finally, MTase-Glo Detection was added and luminescence were read after another 30 min incubation.

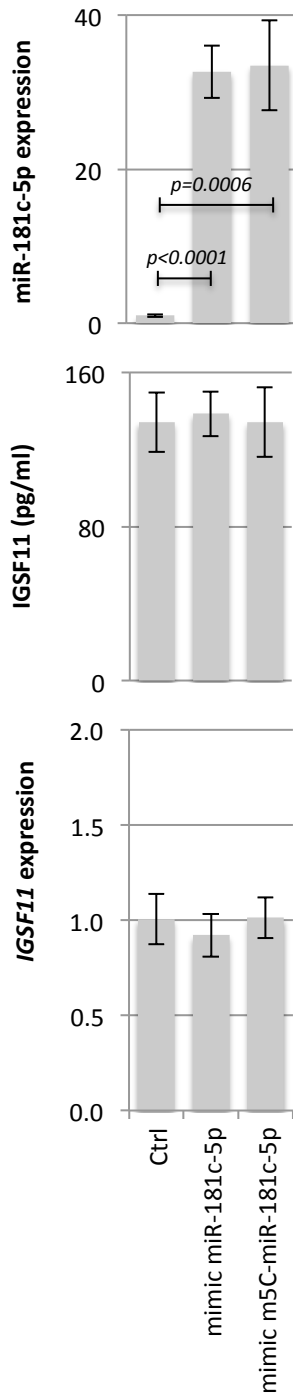

## Supplementary Figure S2

**Impact of the mimic-miR-181c-5p and mimic-m6a-miR-181c-5p on the expression of IGSF11.** Briefly,  $6 \times 10^5$  cells were seeded in each well of 6-well plates. Transfection was performed using HiPerFect Transfection Reagents (Qiagen#301705, France) and 10 ng miRNA. For miR control, transfection control (HiPerfect Transfection Reagent only) and an oligo (miScript Inhibitor Negative Control; Qiagen, France) had been used. 48h after the transfection, cells are recovered to perform miRNA and protein extractions as described in this manuscript. Expression of miRNA-181c-5p was performed by RT-qPCR and IGSF11 by ELISA, as described in this manuscript. Mimic m5C-miR-181c-5p was methylated at cytosine in position 15.

## Supplementary Figure S3

### Impact of Nivolumab on two other lung cancer cell lines: A549 and H1650.

The Nivolumab impact on the adenosine methylation level and the IGSF11 expression level was also investigated in two other lung cancer cell lines: A549 and H1650.

RIP and ELISA indicated that the Nivolumab increased the adenosine methylation level of miR-125a-5p and the IGSF11 expression level (similarly to the observation made in H1975 cells).

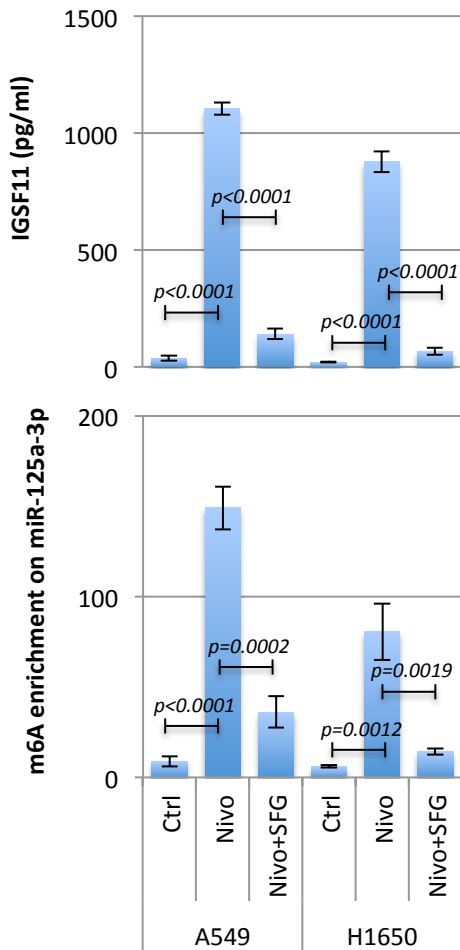

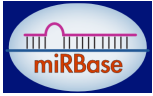

has-miR-125a-5p:  
uccugagacccuuuaaccuguga

**RBPDB**  
The database of RNA-binding protein specificities

New! Read the RBPDB paper at Nucleic Acids Research

**Browse by Domain**

RNA Recognition Motif | K Homology | CCH Zinc Finger | More domains

**Browse by Species**

Homo sapiens | Mus musculus | Drosophila melanogaster | Caenorhabditis elegans

**Search the Database**

Search genes:  Envoyer Advanced

**Predict Binding Sites from PWMs**

Scan your sequence:

Threshold (between 0 and 1): 0.6  
The scan will return matches that are greater than X% of the maximum score for that PWM.  
Envoyer

**Bulk Downloads**

[Go to downloads page](#)

**Submit your data**

[Submit to RBPDB here.](#)

**Contact**

We welcome comments, suggestions and any questions you might have. Please [contact us](#) with your feedback.

### Sequence scan results

Your sequence:

1 UCCUGAGAC CCUUUAACCU GUGA

| Score       | Relative Score | RBP Name | Start | End | Matching sequence | Matrix ID     | Download PWM                 | Download PFM                 |
|-------------|----------------|----------|-------|-----|-------------------|---------------|------------------------------|------------------------------|
| 5.9772799   | 68%            | sap-49   | 19    | 24  | CUGUGA            | 145_9163526   | <a href="#">Download PWM</a> | <a href="#">Download PFM</a> |
| 4.807662807 | 75%            | QKI      | 12    | 21  | CUUUAACCUG        | 1215_16041388 | <a href="#">Download PWM</a> | <a href="#">Download PFM</a> |
| 4.56028632  | 62%            | ACO1     | 19    | 24  | CUGUGA            | 1213_8021254  | <a href="#">Download PWM</a> | <a href="#">Download PFM</a> |
| 4.33678413  | 68%            | YBX1     | 18    | 23  | CCUGUG            | 1177_19561594 | <a href="#">Download PWM</a> | <a href="#">Download PFM</a> |
| 4.31047185  | 68%            | YBX1     | 3     | 8   | CCUGAG            | 1177_19561594 | <a href="#">Download PWM</a> | <a href="#">Download PFM</a> |
| 4.13307226  | 78%            | RBMX     | 2     | 5   | CCCU              | 922_19282290  | <a href="#">Download PWM</a> | <a href="#">Download PFM</a> |
| 4.13307226  | 78%            | RBMX     | 10    | 13  | CCCU              | 922_19282290  | <a href="#">Download PWM</a> | <a href="#">Download PFM</a> |
| 3.739441123 | 80%            | KHDRBS3  | 13    | 18  | UUUAAC            | 1174_19561594 | <a href="#">Download PWM</a> | <a href="#">Download PFM</a> |
| 2.72241089  | 61%            | ELAVL1   | 12    | 15  | CUUU              | 1170_19561594 | <a href="#">Download PWM</a> | <a href="#">Download PFM</a> |

**METTL3 interactors**  
**n=285**  
**(Supplementary File 2)**

## Supplementary Figure S4

Schematic representation of the *in silico* analysis performed with the RBPDB site to identify KHDRBS3 as binding to miR-125a-5p.

Western blot

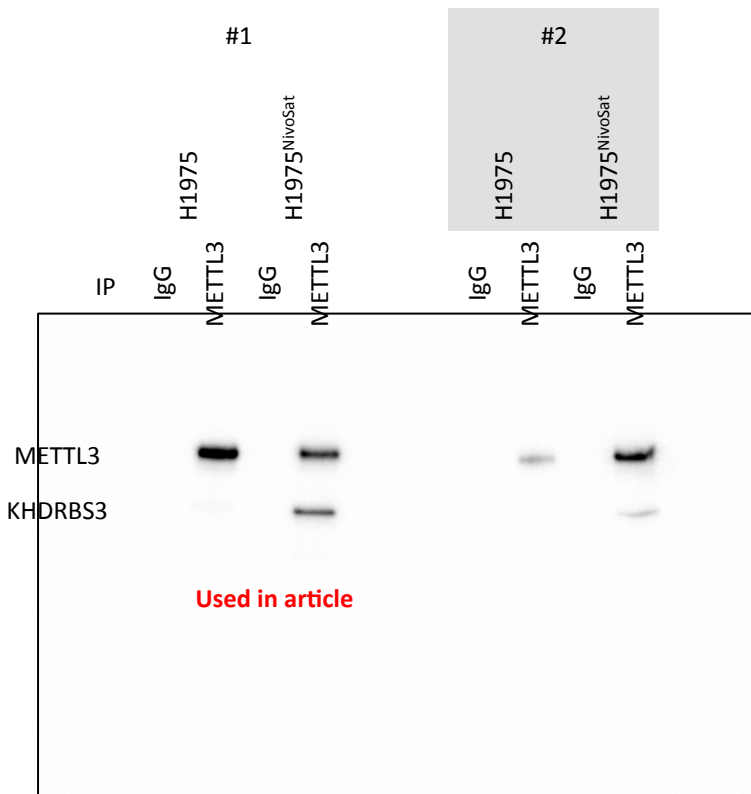

#3

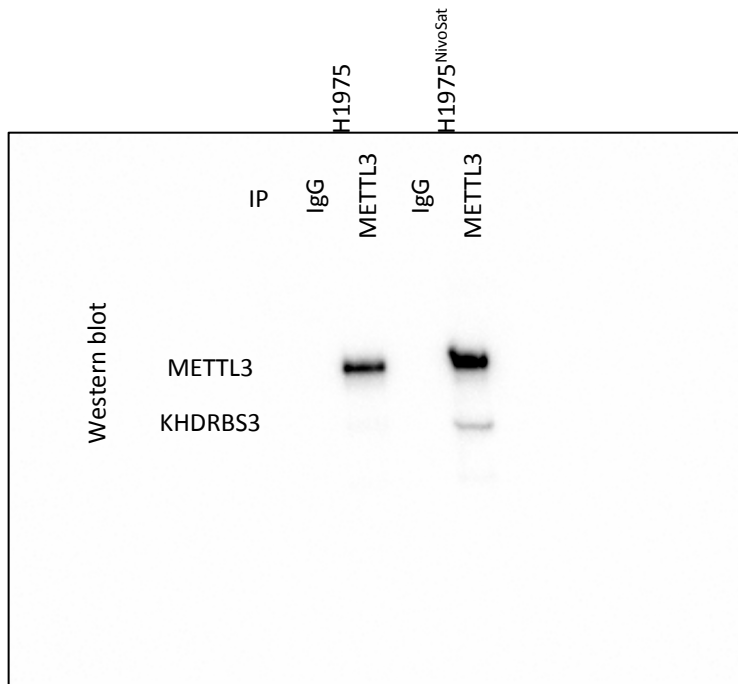

## Supplementary Figure S5.

**Illustration of the three independent co-immunoprecipitations performed.**

The images shown in this figure are from western blot membrane revelations made with the ChemiDoc (Bio-Rad) in “autoexposure” mode and the use of the ECL-Clarity kit (Bio-Rad).

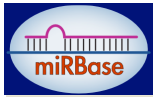

|            |   |   |   |   |   |   |   |   |   |    |    |    |    |    |    |    |    |    |    |    |    |    |
|------------|---|---|---|---|---|---|---|---|---|----|----|----|----|----|----|----|----|----|----|----|----|----|
|            | 1 | 2 | 3 | 4 | 5 | 6 | 7 | 8 | 9 | 10 | 11 | 12 | 13 | 14 | 15 | 16 | 17 | 18 | 19 | 20 | 21 | 22 |
| miR-411-5p | u | a | g | u | a | g | a | c | c | g  | u  | a  | u  | a  | g  | c  | g  | u  | a  | c  | g  |    |
|            |   |   |   |   | D | R | A | C | H |    |    |    |    |    |    |    |    |    |    |    |    |    |

[Home](#) [Browse/Search Genes](#) [Browse/Search Experiments](#) [Bulk Downloads](#) [Help](#) [Search Proteins:](#) [Advanced](#) [Search Experiment types, sequences & PMIDs:](#) [Advanced](#)

# RBPDB

The database of RNA-binding protein specificities

**New! Read the RBPDB paper at Nucleic Acids Research**

**Browse by Domain**

[RNA Recognition Motif](#) [K Homology](#) [CCCH Zinc Finger](#) [More domains](#)

**Browse by Species**

[Homo sapiens](#) [Mus musculus](#) [Drosophila melanogaster](#) [Caenorhabditis elegans](#)

**Search the Database**

Search genes:  [Envoyer](#) [Advanced](#)

**Predict Binding Sites from PWMs**

Scan your sequence:  
UAGUAGACCGUAGGCGUACG

Threshold (between 0 and 1): 0.5  
The scan will return matches that are greater than X% of the maximum score for that PWM.  
[Envoyer](#)

**Bulk Downloads**

[Go to downloads page](#)

**Submit your data**

[Submit to RBPDB here.](#)

**Contact**

We welcome comments, suggestions and any questions you might have. Please [contact us](#) with your feedback.

**Statistics**

|                    |             |
|--------------------|-------------|
| <b>Proteins</b>    | <b>1171</b> |
| Human              | 424         |
| Mouse              | 413         |
| Fly                | 257         |
| Worm               | 244         |
| <b>Experiments</b> | <b>1487</b> |
| <b>PWMs</b>        | <b>73</b>   |

v1.3 release 28.09.2012

**News**

**21.11.2012**  
RBPDB updated to v1.3.1: [release notes](#)

**28.09.2012**  
RBPDB updated to v1.3: [release notes](#)

**19.07.2011**  
Fixed typo in puf5 motif: [release notes](#)

**25.01.2011**  
Bugfix to sequence scan: [release notes](#)

**24.11.2010**  
RBPDB updated to v1.2: [release notes](#)

**08.10.2010**  
RBPDB updated to v1.1: C.elegans and TROVE domain proteins added

**14.08.2010**  
v1.0 of RBPDB is online!

## Sequence scan results

Your sequence:

1 UAGUAGACCG UAUAGCGUAC G

| Score      | Relative Score | RBP Name | Start | End | Matching sequence | Matrix ID     | Download PWM                 | Download PFM                 |
|------------|----------------|----------|-------|-----|-------------------|---------------|------------------------------|------------------------------|
| 5.36340303 | 86%            | YTHDC1   | 15    | 20  | GCGUAC            | 969_20167602  | <a href="#">Download PWM</a> | <a href="#">Download PFM</a> |
| 2.57730567 | 53%            | RBM4     | 14    | 17  | AGCG              | 1172_19561594 | <a href="#">Download PWM</a> | <a href="#">Download PFM</a> |

## Supplementary Figure S6

Schematic representation of the *in silico* analysis performed with the RBPDB site to identify KHDRBS3 as binding to miR-125a-5p.

 Harmonizome

All

Q

SEARCHDOWNLOADVISUALIZEPREDICTAPIMOBILEABOUT

ELK1

Gene Set

Dataset

ENCODE Transcription Factor Targets

Category

Genomics

Type

Transcription factor

Description

ELK1, member of ETS oncogene family[This gene is a member of the Ets family of transcription factors and of the ternary complex factor (TCF) subfamily. Proteins of the TCF subfamily form a ternary complex by binding to the the serum response factor and the serum response element in the promoter of the c-fos proto-oncogene. The protein encoded by this gene is a nuclear target for the ras-raf-MAPK signalling cascade. This gene produces multiple isoforms by using alternative translational start codons and by alternative splicing. Related pseudogenes have been identified on chromosomes 7 and 14. [provided by RefSeq, Mar 2012] (NCBI Entrez Gene Database, 2002)

External Link

<http://www.ncbi.nlm.nih.gov/gene/2002>

Similar Terms

Q

Downloads & Tools



Genes

12271 target genes of the **ELK1** transcription factor in ChIP-seq datasets from the ENCODE Transcription Factor Targets dataset.

Show

entries

Filter

KHDRBS3

Symbol

Name

KHDRBS3

KH domain containing, RNA binding, signal transduction associated 3

Showing 1 to 1 of 1 entries (filtered from 12,271 total entries)

Previous

1

Next

**Supplementary Figure S7**  
Screenshot of the use of the Harmonizome site.

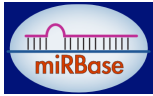

has-miR-125a-5p:  
ucccugagaccuuuaaccuguga

RBPDB

The database of RNA-binding protein specificities

**RBP Name**

sap-49

QKI

ACO1

YBX1

YBX1

RBMX

RBMX

KHDRBS3

ELAVL1

## List of m6A-binding proteins

| Name                 | References                                                                                                                                                                                                                                                |
|----------------------|-----------------------------------------------------------------------------------------------------------------------------------------------------------------------------------------------------------------------------------------------------------|
| YTHDF1               | Zhao, Y., Shi, Y., Shen, H. <i>et al.</i> m6A-binding proteins: the emerging crucial performers in epigenetics. <i>J Hematol Oncol</i> 13, 35 (2020). <a href="https://doi.org/10.1186/s13045-020-00872-8">https://doi.org/10.1186/s13045-020-00872-8</a> |
| YTHDF2               |                                                                                                                                                                                                                                                           |
| YTHDF3               |                                                                                                                                                                                                                                                           |
| YTHDC1               |                                                                                                                                                                                                                                                           |
| YTHDC2               |                                                                                                                                                                                                                                                           |
| HNRNPA2B1            |                                                                                                                                                                                                                                                           |
| HNRNPC               |                                                                                                                                                                                                                                                           |
| <b>HNRNPG (RBMX)</b> |                                                                                                                                                                                                                                                           |
| IGF2BP1              |                                                                                                                                                                                                                                                           |
| IGF2BP2              |                                                                                                                                                                                                                                                           |
| IGF2BP3              |                                                                                                                                                                                                                                                           |
| <b>HuR (ELAVL1)</b>  | Choi et la. Cell Rep. 2022. PMID: 36044854                                                                                                                                                                                                                |
| SND1                 |                                                                                                                                                                                                                                                           |
| RBM45                | Zhang et Hamada Front. Genet. 2021                                                                                                                                                                                                                        |
| YTHDF1               |                                                                                                                                                                                                                                                           |
| YTHDF2               |                                                                                                                                                                                                                                                           |
| YTHDF3               |                                                                                                                                                                                                                                                           |
| RBM15                |                                                                                                                                                                                                                                                           |
| RBM15B               |                                                                                                                                                                                                                                                           |
| YTHDC1               |                                                                                                                                                                                                                                                           |
| EIF3D                |                                                                                                                                                                                                                                                           |
| NOP58                |                                                                                                                                                                                                                                                           |
| HNRNPH1              |                                                                                                                                                                                                                                                           |
| NUDT21               |                                                                                                                                                                                                                                                           |
| FMR1                 |                                                                                                                                                                                                                                                           |
| DDX3X                |                                                                                                                                                                                                                                                           |
| EIF3A                |                                                                                                                                                                                                                                                           |
| CPSF6                |                                                                                                                                                                                                                                                           |
| CPSF7                |                                                                                                                                                                                                                                                           |
| RBM3                 |                                                                                                                                                                                                                                                           |
| CREBBP               |                                                                                                                                                                                                                                                           |
| SRSF2                |                                                                                                                                                                                                                                                           |
| SRSF1                |                                                                                                                                                                                                                                                           |
| CPSF6                |                                                                                                                                                                                                                                                           |
| CIRBP                |                                                                                                                                                                                                                                                           |

## Supplementary Figure S8.

Schematic representation of the *in silico* analysis performed to identify the “m6A-binding proteins” having the ability to bind miR-125a-5p according to the use of the RBPDB website.



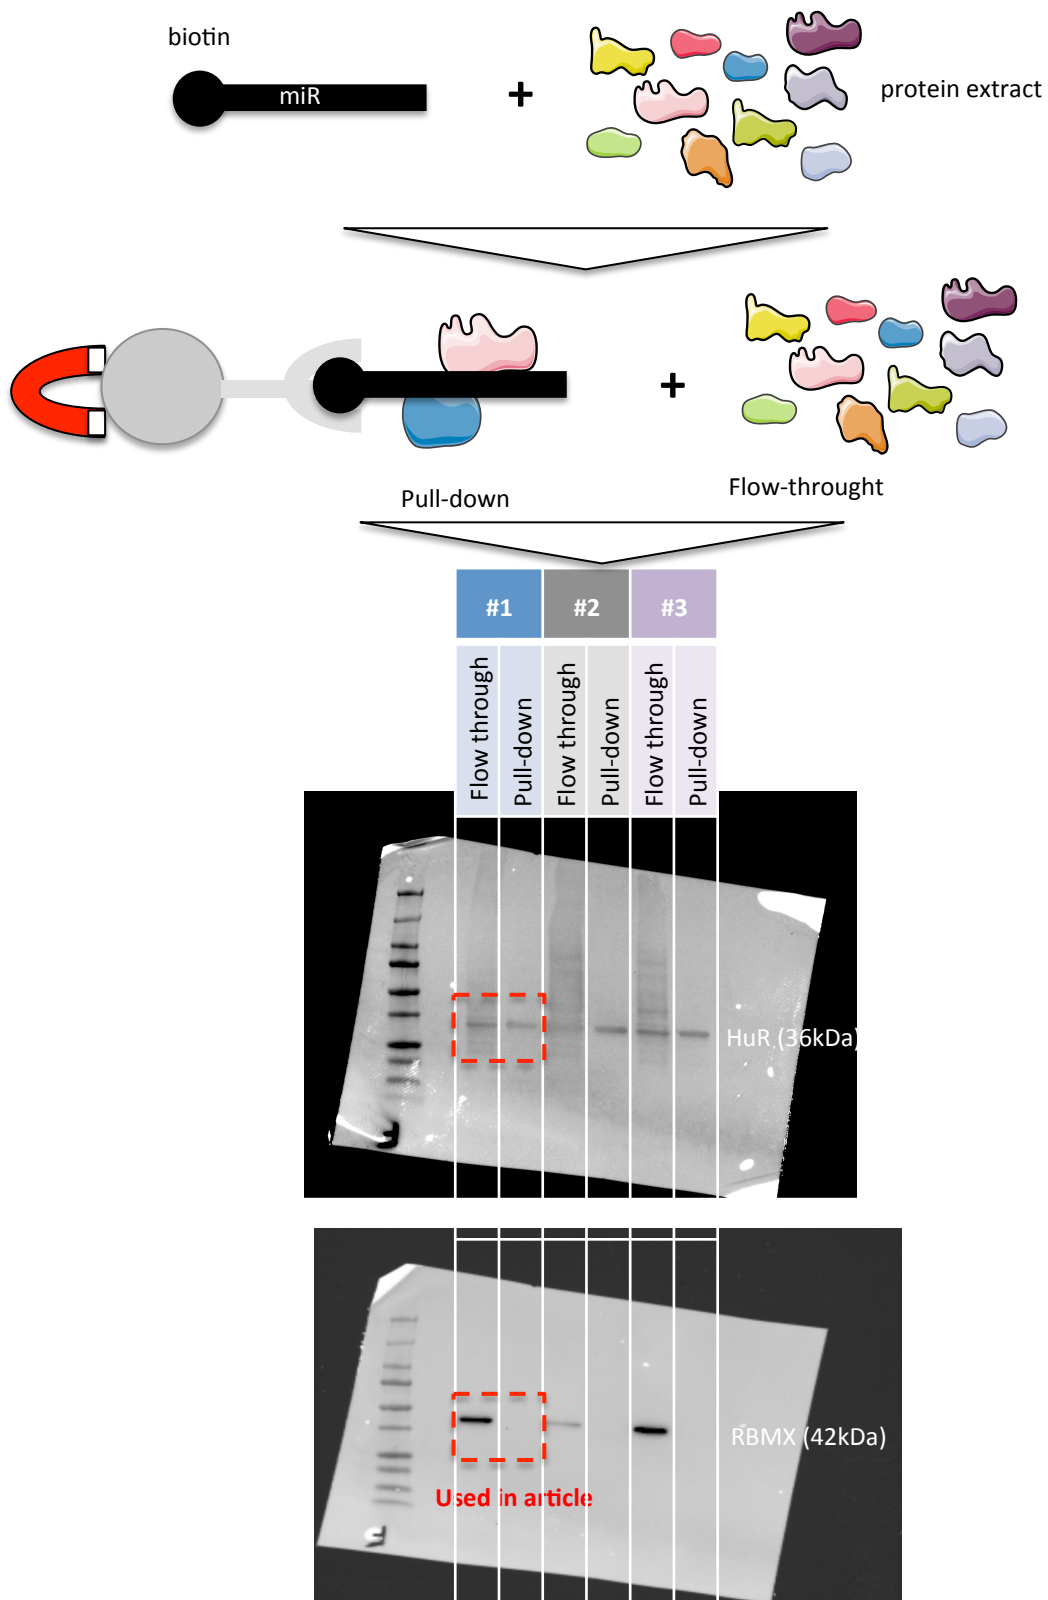

## Supplementary Figure S9.

### Illustration of the miRNA pull-down assay.

The images shown in this figure are from western blot membrane revelations made with the ChemiDoc (Bio-Rad) in “autoexposure” mode and the use of the ECL-Clarity kit (Bio-Rad). #1, #2 and #3 represent the triplicate of experiments.

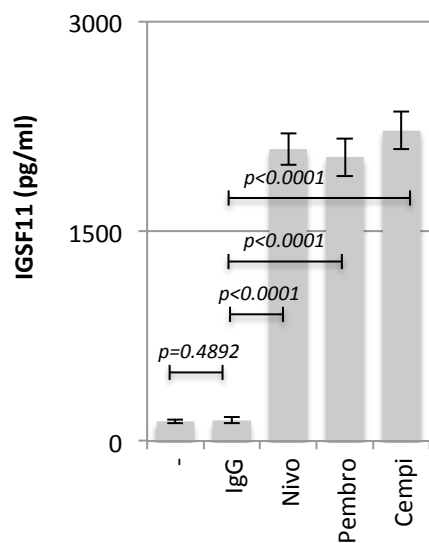

## Supplementary Figure S10

Impact of Pembrolizumab and Cemiplimab on the IGSF11 expression.

The impact of Pembrolizumab (Pembro, 0.1  $\mu\text{g/ml}$ ) and Cemiplimab (Cemip, 0.1  $\mu\text{g/ml}$ ) on IGSF11 expression level was compared to the one of Nivolumab (Nivo) according with the experimental design shown in Figure 1B. IgG antibody (0.1 mg/ml) was used as control. Analysis of IGSF11 expression was performed using ELISA (#LS-F65302, LSBio, US).

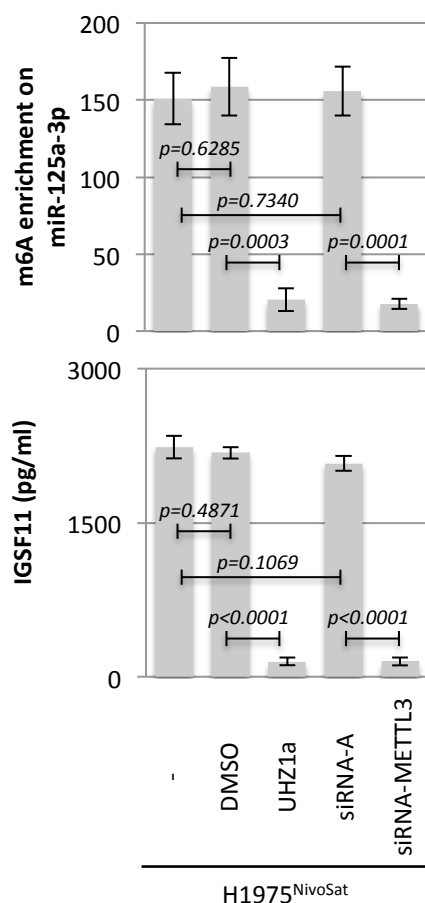

## Supplementary Figure S11

Impact of chemical and biological inhibition of METTL3 on the adenosine methylation level of miR-125a-3p and IGF11 expression. H1975 cells were treated with Nivolumab as described in Figure 1B. Then, UHZ1a (30mM, 48h, #HY-134673A, MedChemExpress, Europe) and siRNA-METTL3 (50pmol, #sc-92172, Santa Cruz, France) were used to chemically and biologically inhibit METTL3 in these cells. DMSO and siRNA-A (#sc94636, Santa Cruz, France) were used as control. HiPerfect Transfection Reagent kit (#301705, Qiagen, France) were used to perform siRNA transfection according with the manufacturer's instructions. m6A-RIP and ELISA were then performed as already described in this manuscript.
